# Supplementary material for: Pharmaceutical Evaluation of Levofloxacin Orally Disintegrating Tablet Formulation Using Low Frequency Raman Spectroscopy
Source: Preprints.org preprint supplement (doi:10.20944/preprints202306.0130.v1), 2023-06-02
Supplement: Supplementary file 7 [file supplementary]

Fig. S3

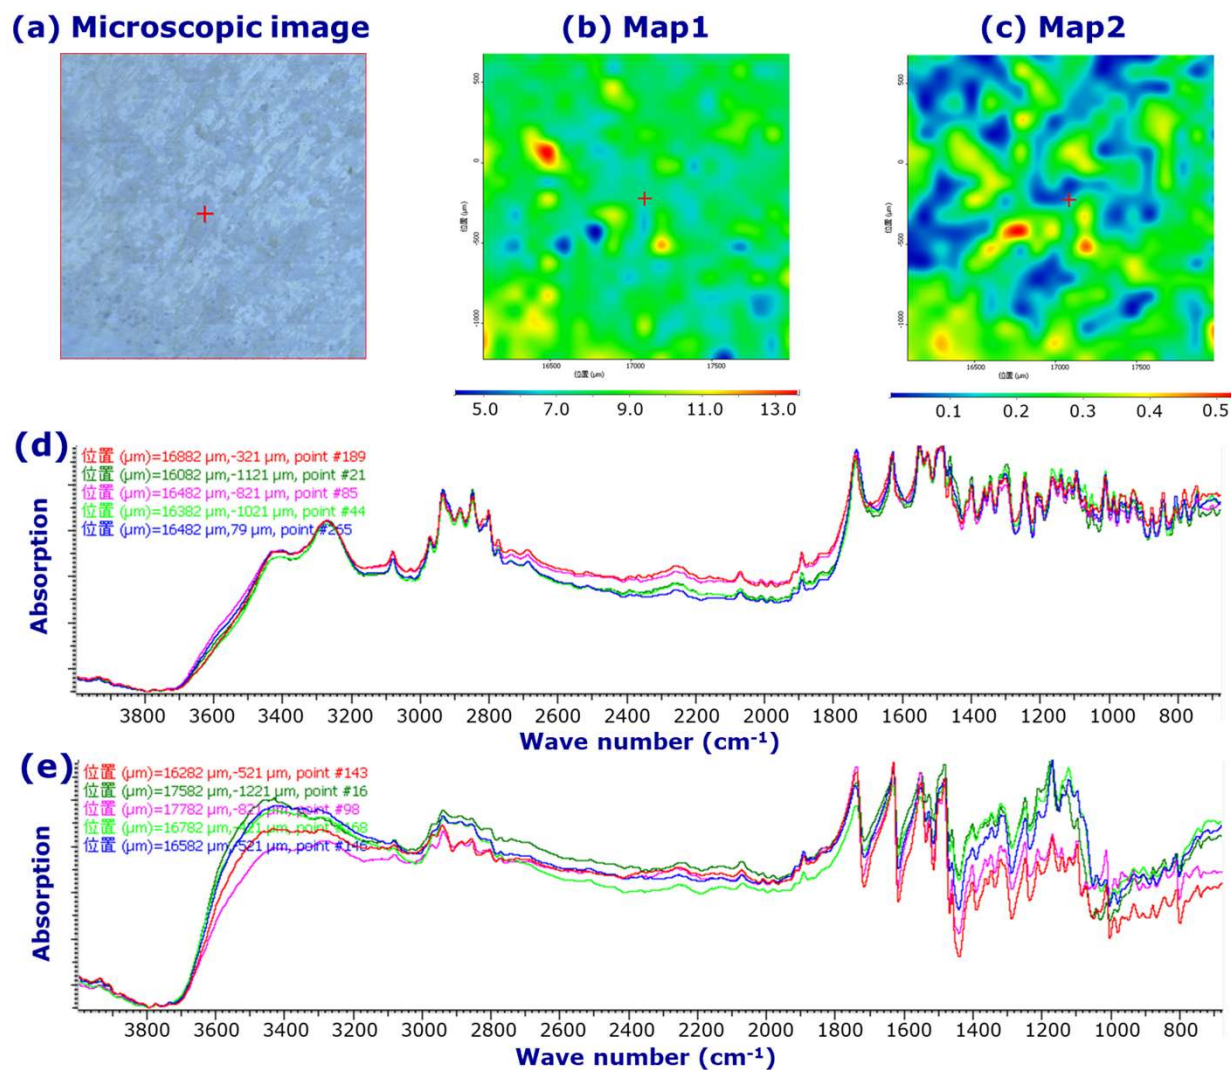

**Figure S3** Microscopic and mapping images of the LV tablet formulation LV<sub>T\_SAWAI</sub> by microscopic IR spectroscopy (2000 μm × 2000 μm). Microscopic image (a), Map 1; mapping image obtained from the PA<sub>1700-1800</sub> of each spectrum. The red and blue regions indicate the high and low peak areas, respectively. The measurement area was 2000 μm × 2000 μm (b), Map 2; mapping image obtained from the CR<sub>MCC</sub> of each spectrum. The red and blue regions indicate high and low correlations, respectively. The measurement area was 2000 μm × 2000 μm (c), IR spectra obtained from the measurement points in the red (d) and blue regions (e) of Map 1.
