# Supplementary material for: Pharmaceutical Evaluation of Levofloxacin Orally Disintegrating Tablet Formulation Using Low Frequency Raman Spectroscopy
Source: Preprints.org preprint supplement (doi:10.20944/preprints202306.0130.v1), 2023-06-02
Supplement: Supplementary file 8 [file supplementary]

Archive with 7 entries (7 files):
- Pharmacutics_Manuscript_Yamamoto_FigS1.pdf
- Pharmacutics_Manuscript_Yamamoto_FigS2.pdf
- Pharmacutics_Manuscript_Yamamoto_FigS3.pdf
- Pharmacutics_Manuscript_Yamamoto_FigS4.pdf
- Pharmacutics_Manuscript_Yamamoto_FigS5.pdf
- Pharmacutics_Manuscript_Yamamoto_FigS6.pdf
- Pharmacutics_Manuscript_Yamamoto_FigS7.pdf
