# Supplementary material for: Pharmaceutical Evaluation of Levofloxacin Orally Disintegrating Tablet Formulation Using Low Frequency Raman Spectroscopy
Source: Preprints.org preprint supplement (doi:10.20944/preprints202306.0130.v1), 2023-06-02
Supplement: Supplementary file 8 [file supplementary › Pharmacutics_Manuscript_Yamamoto_FigS1.pdf]

Fig. S1

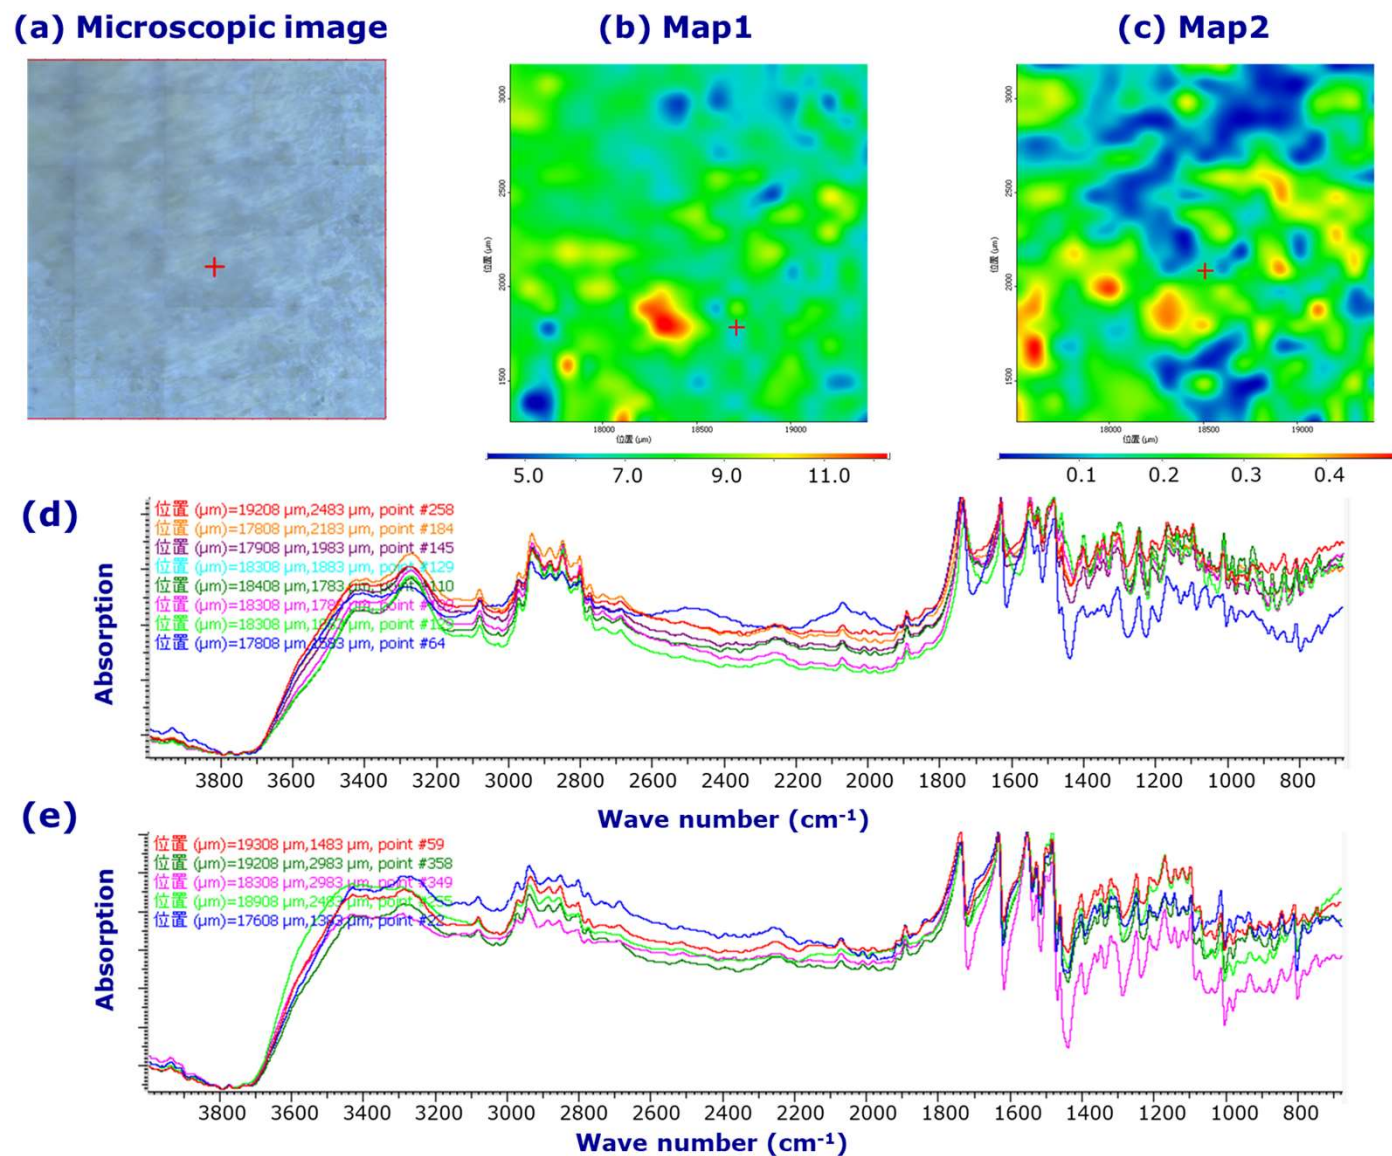

**Figure S1** Microscopic and mapping images of the LV tablet formulation  $LV_{T\_CRAVIT}$  by microscopic IR spectroscopy ( $2000\ \mu\text{m} \times 2000\ \mu\text{m}$ ). Microscopic image (a), Map 1; mapping image obtained from the  $PA_{1700-1800}$  of each spectrum. The red and blue regions indicate the high and low peak areas, respectively. The measurement area was  $2000\ \mu\text{m} \times 2000\ \mu\text{m}$  (b), Map 2; mapping image obtained from the  $CR_{MCC}$  of each spectrum. The red and blue regions indicate high and low correlations, respectively. The measurement area was  $2000\ \mu\text{m} \times 2000\ \mu\text{m}$  (c), IR spectra obtained from the measurement points in the red (d) and blue regions (e) of Map 1.
