# Supplementary figures and images for: Pharmaceutical Evaluation of Levofloxacin Orally Disintegrating Tablet Formulation Using Low Frequency Raman Spectroscopy
Source: Preprints.org preprint supplement (doi:10.20944/preprints202306.0130.v1), 2023-06-02

Fig. S5

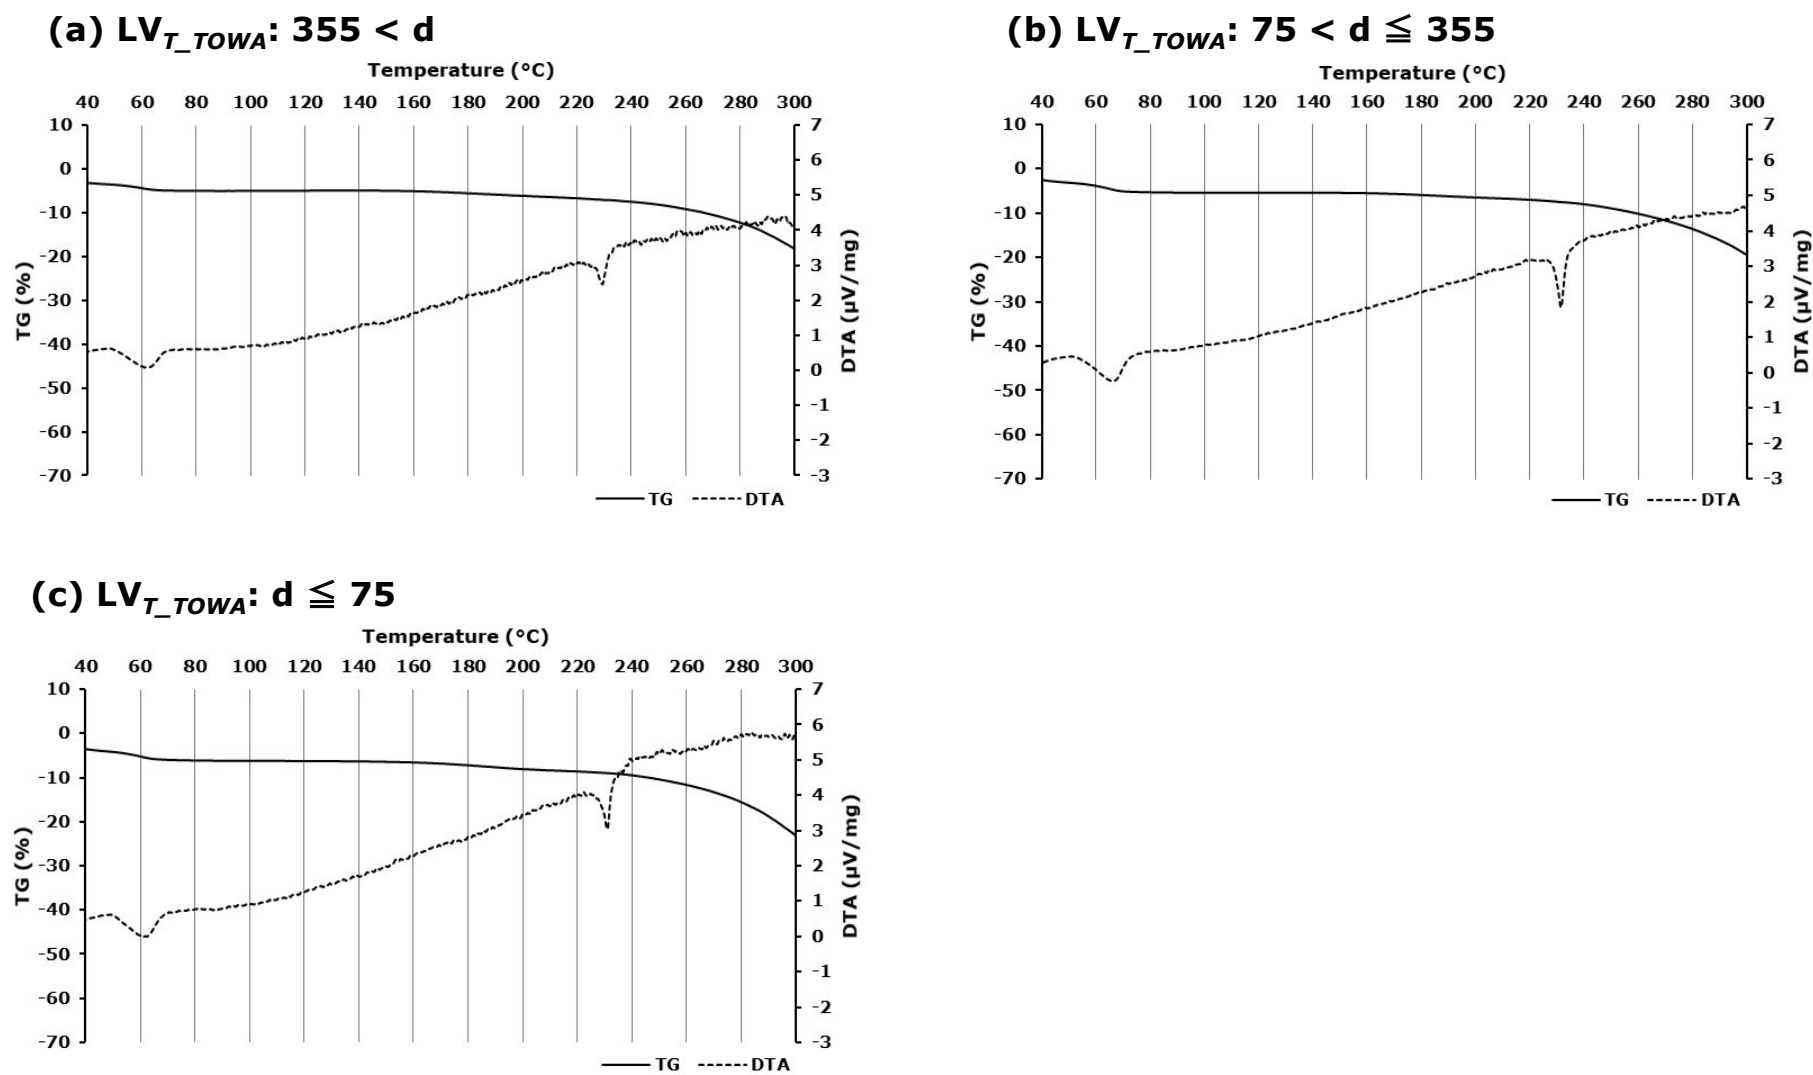

Figure S5 TG-DTA curves of lightly crushed  $LV_{T\_TOWA}$  of several particle size.

Supplement: Supplementary file 2 [file supplementary]

Fig. S4

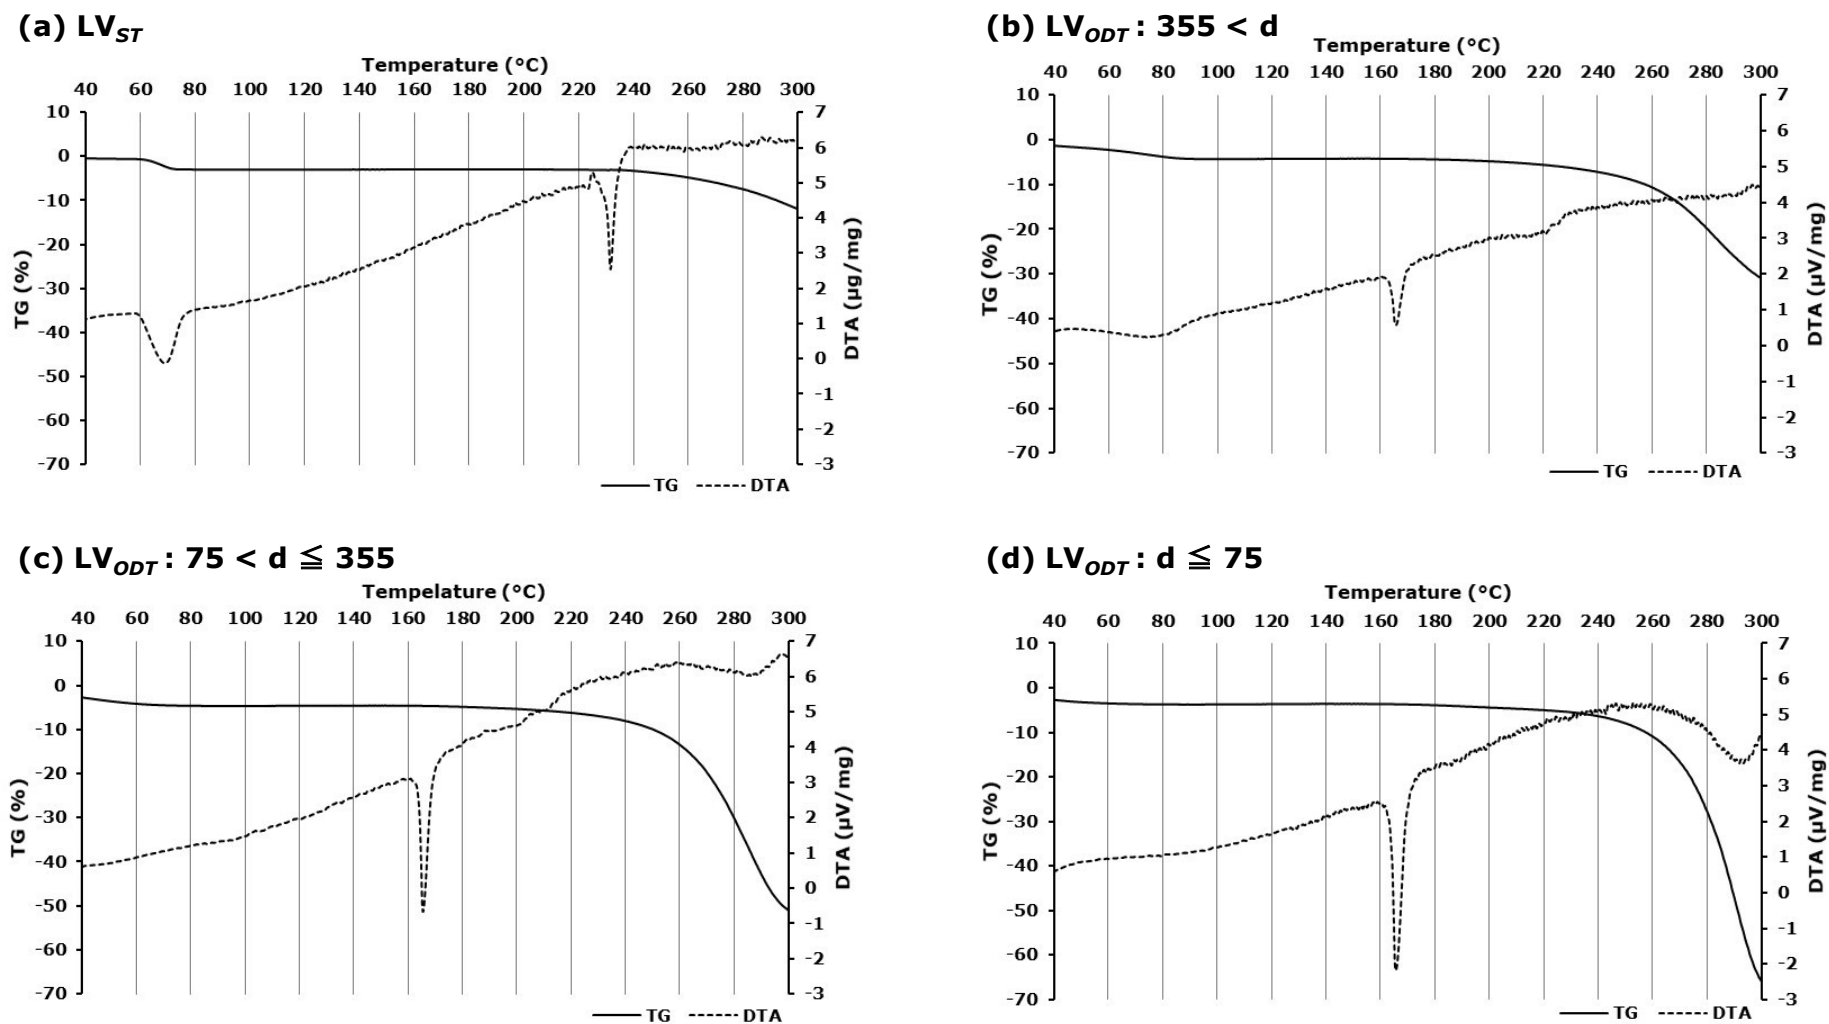

Figure S4 TG-DTA curves of lightly crushed  $LV_{ST}$  (a) and  $LV_{ODT}$  of several particle size (b-d).

Supplement: Supplementary file 3 [file supplementary]

Fig. S6

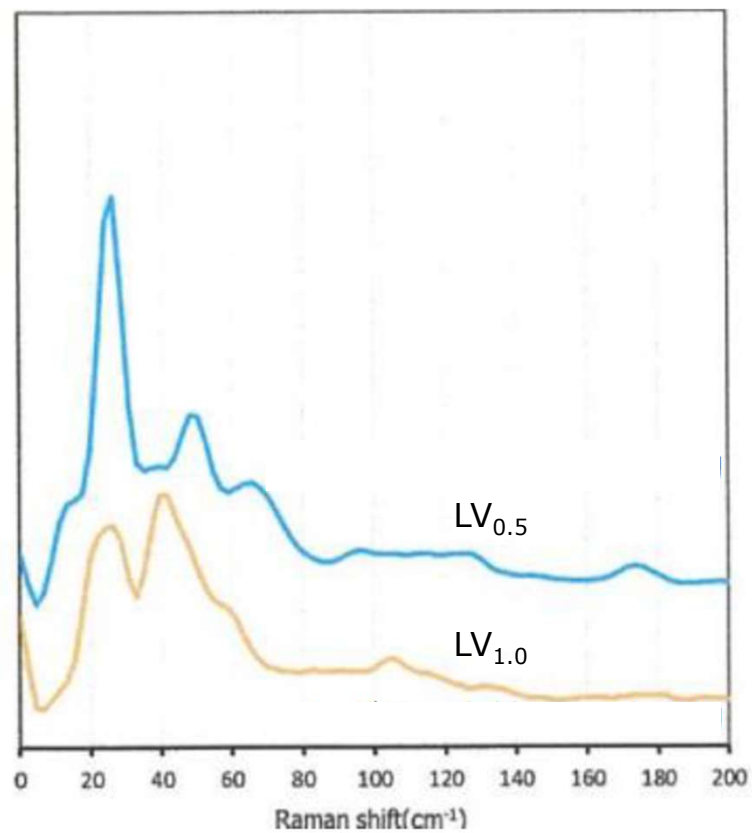

Figure S6 Raman spectrum of experimentally prepared LV<sub>0.5</sub> and LV<sub>1.0</sub>

Supplement: Supplementary file 4 [file supplementary]

Fig. S7

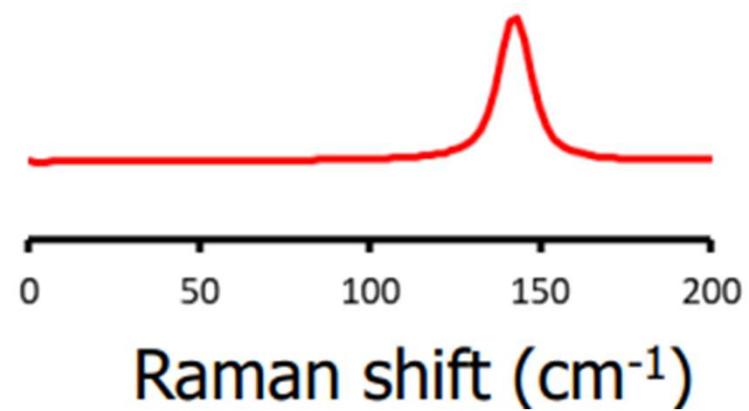

Figure S7 Raman spectra of titanium dioxide.

Supplement: Supplementary file 5 [file supplementary]

Fig. S1

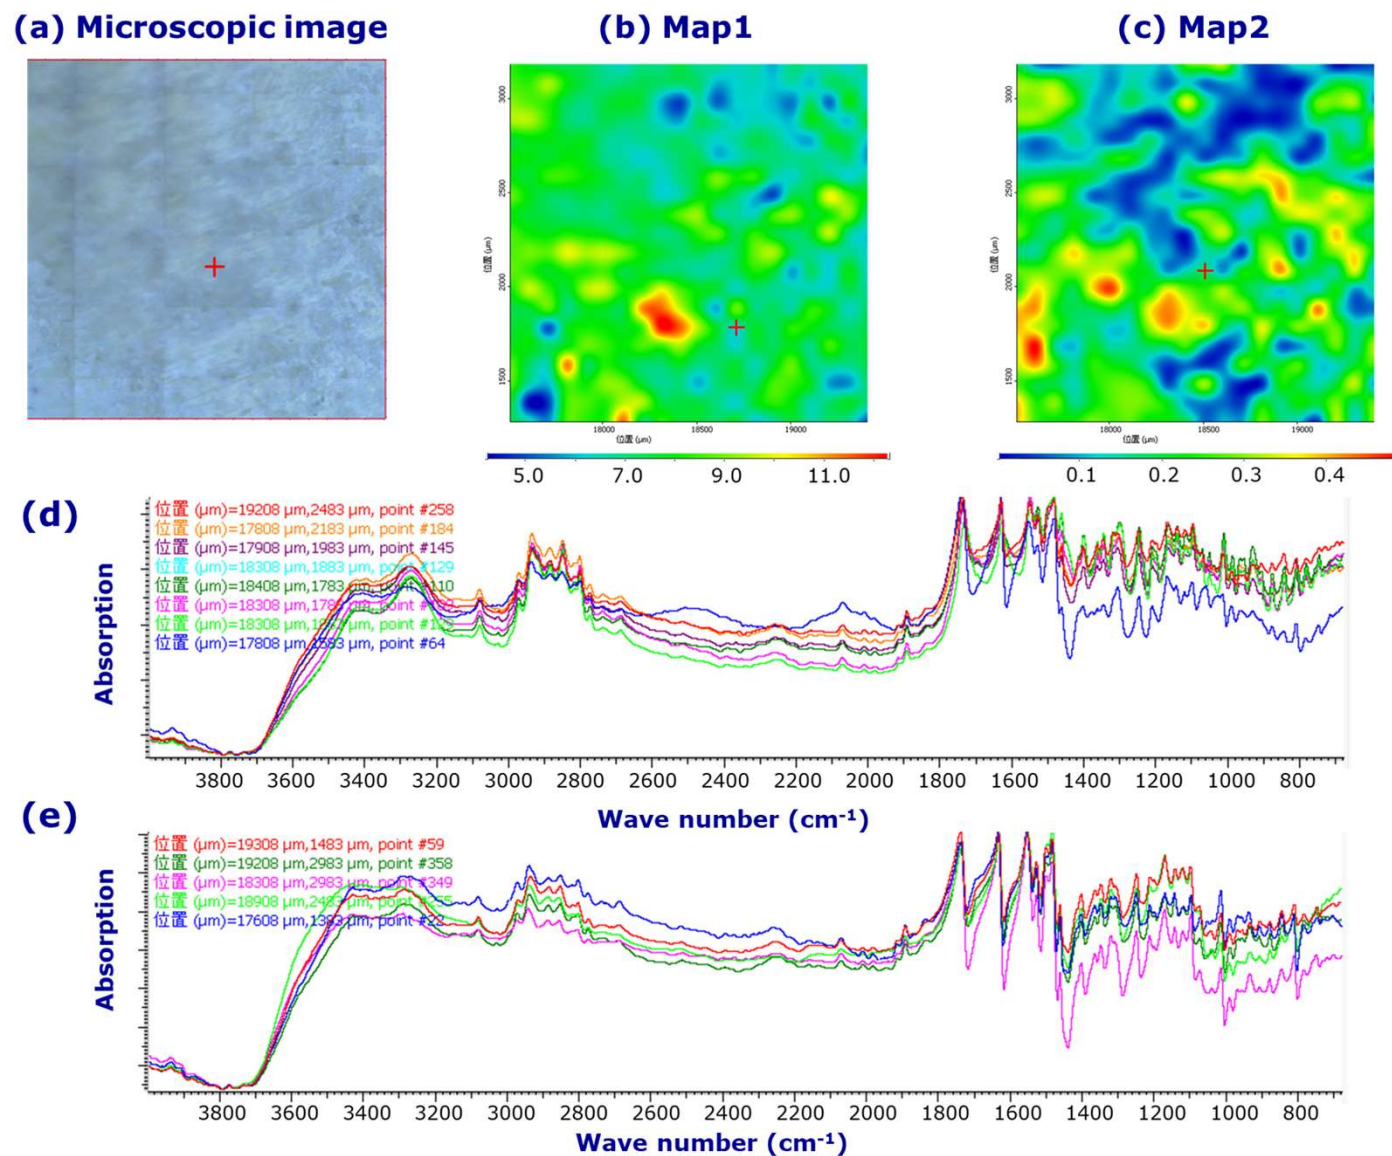

Supplement: Supplementary file 6 [file supplementary]
